# Supplementary material for: A signalling axis involving CNOT3, Aurora B and ERK promotes differentiation and survival of mesendodermal progenitor cells
Source: bioRxiv or medRxiv preprint supplement (doi:10.1101/756932), 2021-02-18
Supplement: Supplementary file [file media-1.pdf]

**Sarkar et al.**

**SUPPLEMENTAL INFORMATION**

# SUPPLEMENTARY FIGURE 1

**a**

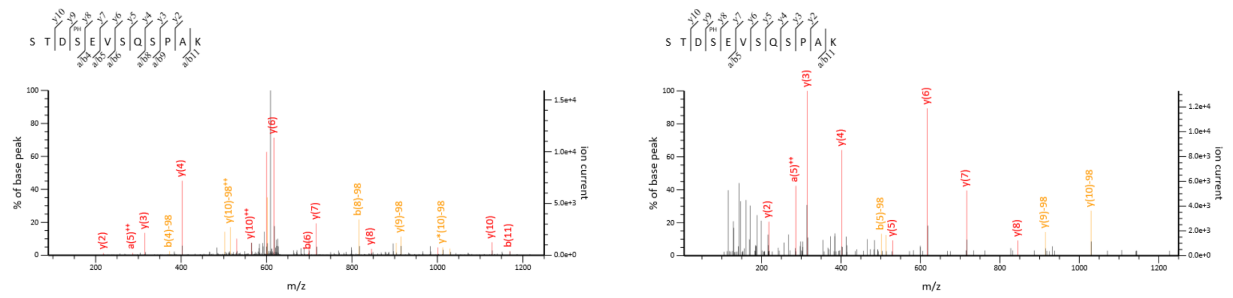

**b**

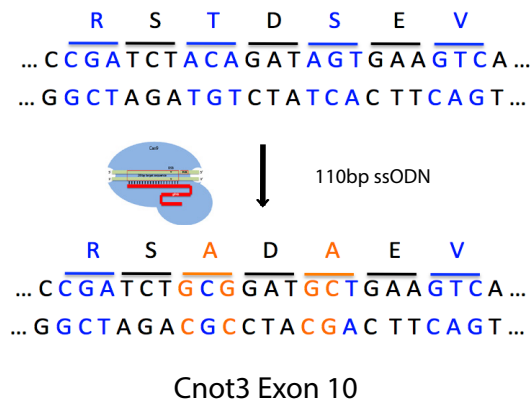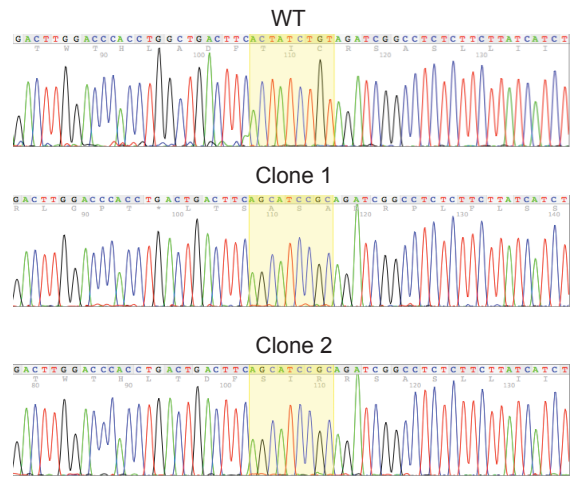

**c**

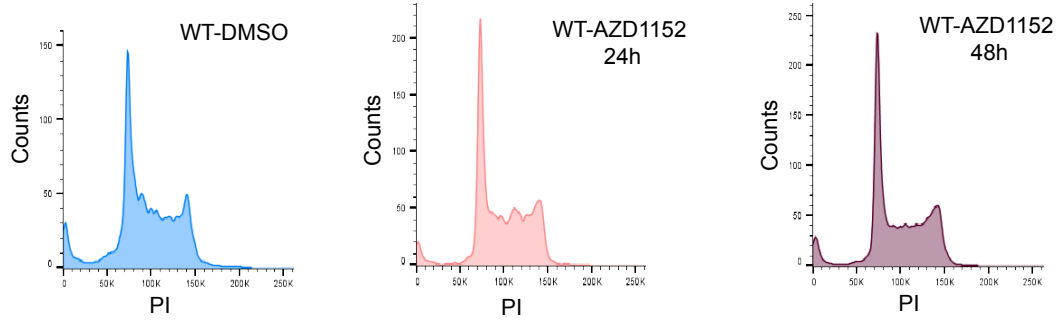

**d**

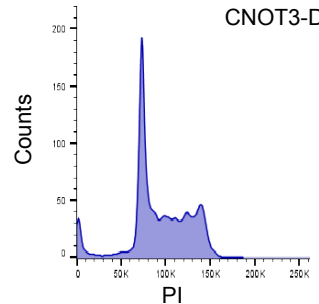

**e**

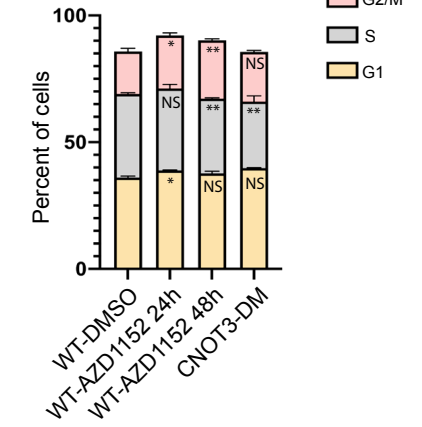

## **Supplementary Figure 1: Identification of Aurora B phosphorylation sites in the CNOT3 protein**

**a.** MS/MS fragmentation spectrum generated by ion trap collision-induced dissociation (CID) of doubly charged precursor ion with  $m/z$  658.27 identifying CNOT3 tryptic peptide 291-302 (STDSEVSQSPAK). The spectrum presented two fragments which were as follows: Left panel: query number 2609 with assigned b- and y-ions; MASCOT score: 54; expectation value:  $1.8 \times 10^{-5}$ ; neutral loss of  $H_3PO_4$  (-97.98 Da) from precursor ion detected at  $m/z$  609.49; localisation probability for phosphorylation of Ser291: 3.0%, Thr292: 3.0%, Ser294 is 93.9%. Right panel: query number 2608 with assigned b- and y-ions; MASCOT score: 53; expectation value:  $3.6 \times 10^{-5}$ ; localisation probability for phosphorylation of Ser291: 25.6%, Thr292: 25.6%, Ser294: 48.4%.

**b.** Left panel: Schematic representation showing use of CRISPR/Cas9 targeting of *Cnot3* in exon 10 to mutate Threonine 292 and Serine 294 to alanine, using the guide RNA described in Methods and a 110 bp single-stranded donor oligonucleotides (ssODN) carrying the mutations. Right panel: Sequence images showing the wild-type (WT) sequence and the mutated sequences obtained from two CRISPR generated clones.

**c.** FACS analysis of the cell cycle profiles of ESCs incubated for 24 and 48 hours with the Aurora B inhibitor AZD1152 or with vehicle (DMSO) and stained with propidium iodide (PI).

**d.** FACS analysis of the cell cycle profile of *Cnot3*-DM ESCs.

**e.** Histograms showing the percentage of cells measured at different phases of the cell cycle in (c) and (d). Mean  $\pm$  SEM; P values (with respect to WT-DMSO) calculated by unpaired *t*-test, ns = non-significant,  $n=3$ .

**SUPPLEMENTARY FIGURE 2**

**a**

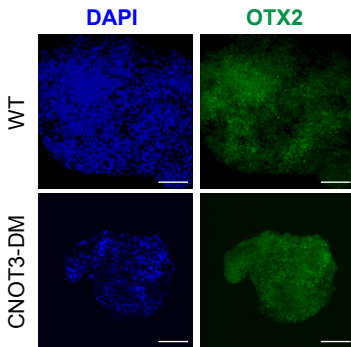

**b**

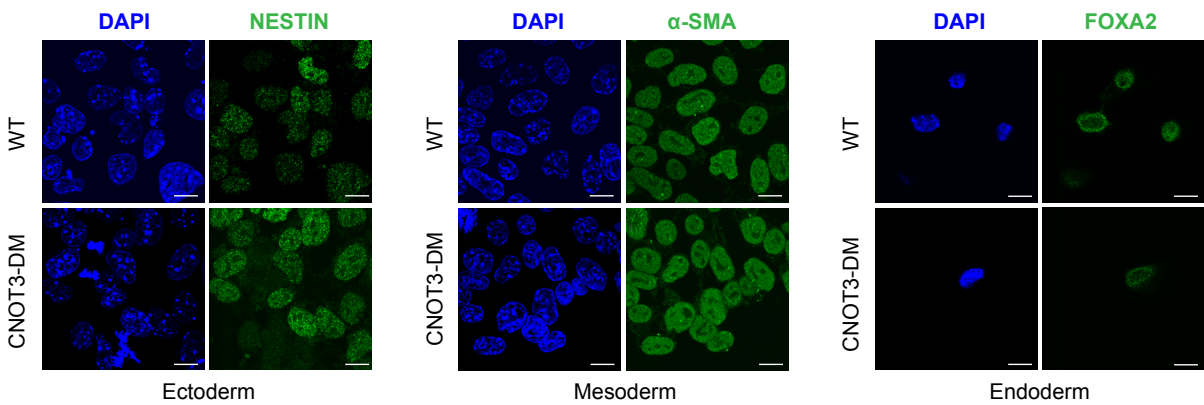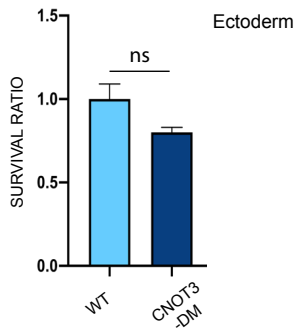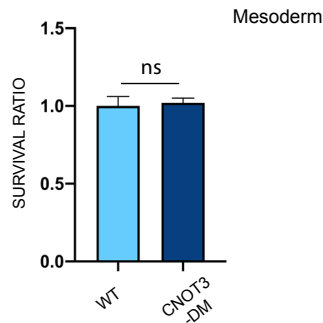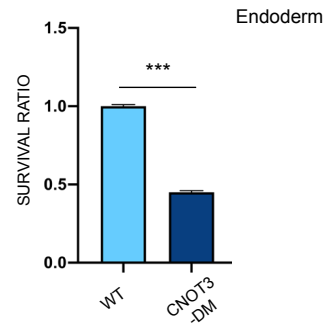

**Supplementary Figure 2: Differentiation of *Cnot3*-DM ESCs into the three germ layers**

**a.** Representative confocal images of 8-day embryoid bodies (EBs) derived from wild-type (WT) and *Cnot3*-DM ESCs and subjected to immunostaining for the ectodermal marker OTX2 (green). Nuclei were counterstained with DAPI; scale bar: 100  $\mu$ m.

**b.** Top panels: Representative confocal images of differentiation of WT and *Cnot3*-DM ESCs into ectoderm (3 days; immunostained for Nestin (*green*)), Activin A induced mesoderm (3 days; immunostained for  $\alpha$ -SMA (*green*)) and FGF2+retinoic acid induced endoderm (3 days; immunostained for FOXA2 (*green*)). Nuclei were counterstained with DAPI; scale bar: 12  $\mu$ m. (See Methods). Bottom panels: Graphs represent the ratio of surviving *Cnot3*-DM cells versus WT cells after 3 days of differentiation into each lineage. Cell survival was measured using WST-1 reagent (see Methods). Mean  $\pm$  SEM; (P values calculated by unpaired *t*-test, \*\*\*P<0.001. ns = non-significant, *n*=3).

**SUPPLEMENTARY FIGURE 3**

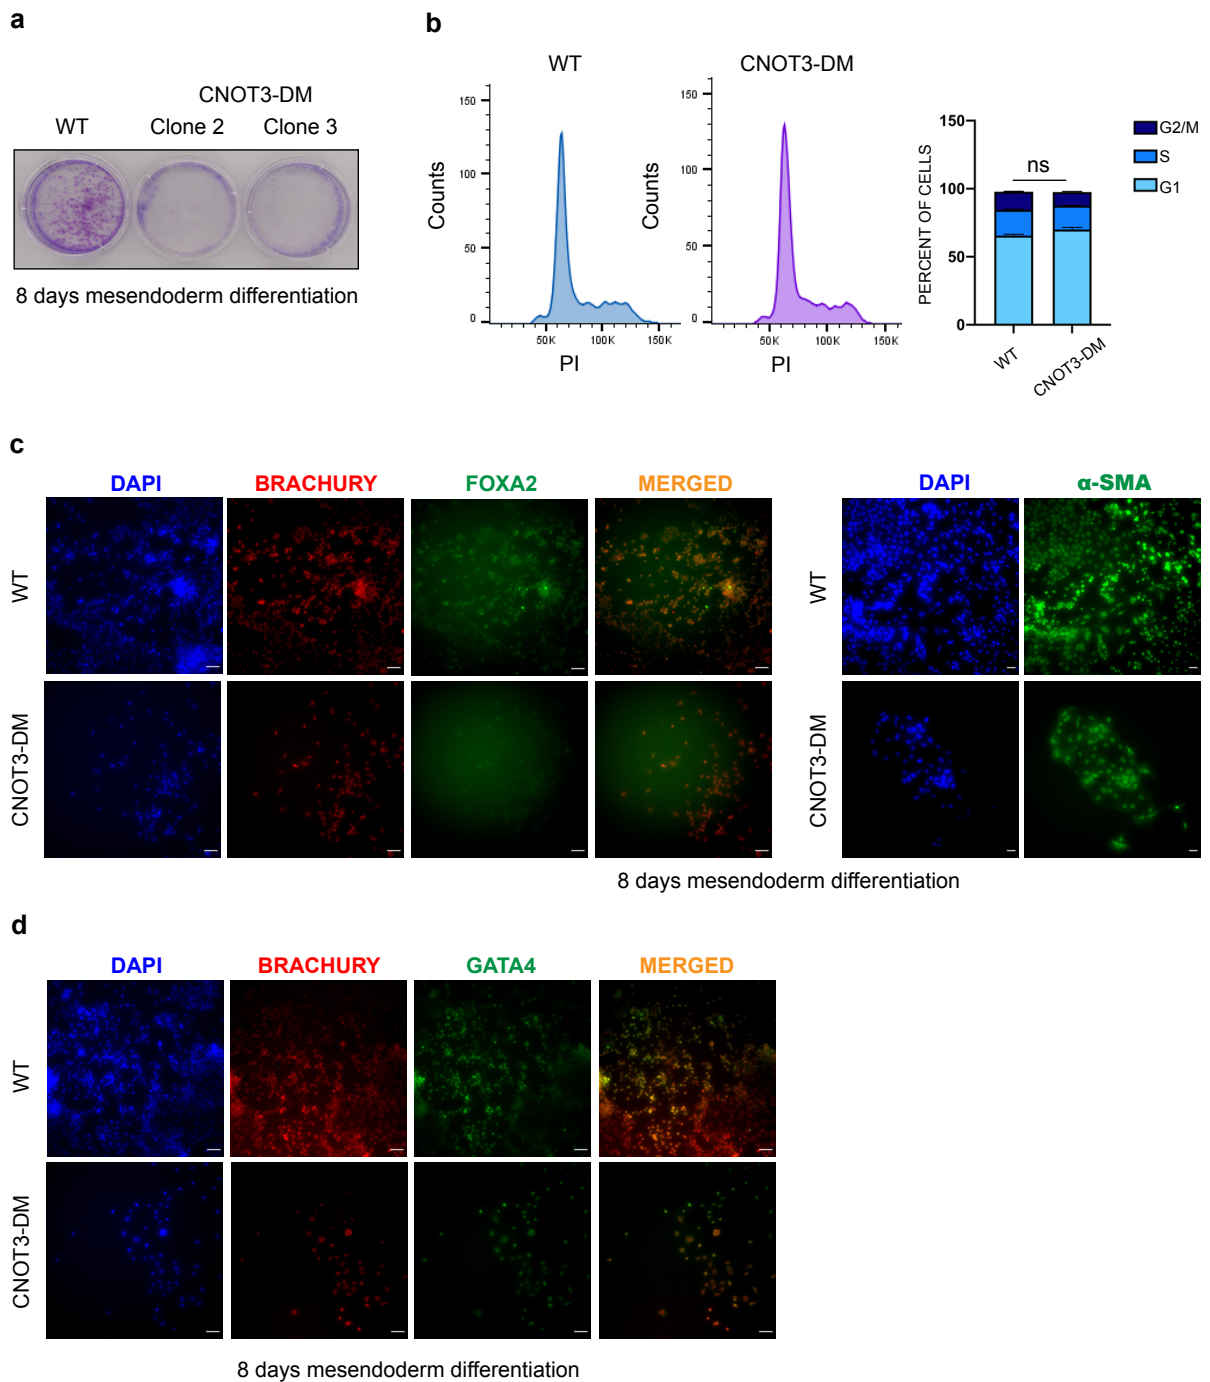

**Supplementary Figure 3: CNOT3-T292/S294 phosphorylation promotes survival of differentiating mesendodermal cells.**

**a.** Crystal violet staining showing the efficiency of BMP4+FGF2 induced mesendoderm (ME) differentiation of wild-type (WT) ESCs and two additional clones of *Cnot3*-DM ESCs after 4 days of differentiation.

**b.** Cell cycle analysis of ME cells obtained by inducing differentiation of WT and *Cnot3*-DM ESCs with BMP4 + FGF2 for 4 days. Histograms represent the percentage of cells at different phases of the cell cycle. Mean  $\pm$  SEM; P values calculated by unpaired *t*-test, ns = non-significant, *n*=3.

**c. and d.** Representative immunofluorescence analysis images of ME cells by inducing 8 differentiation of WT and *Cnot3*-DM ESCs with BMP4 + FGF2 for 8 days (left panel: scale bar: 100  $\mu$ m). Staining was for the mesodermal marker Brachury (*red*) and endodermal marker FOXA2 (green) (**c**) or GATA4 (green) (**d**) in Merged images show dual staining of the mesendodermal cells. Immunofluorescence was also performed for the mesodermal marker  $\alpha$ -SMA (**c**: right panel; scale bar: 60  $\mu$ m). Nuclei were counterstained with DAPI.

**SUPPLEMENTARY FIGURE 4**

**a**

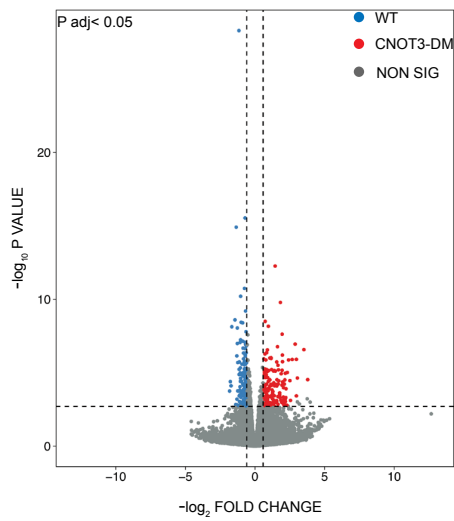

**b**

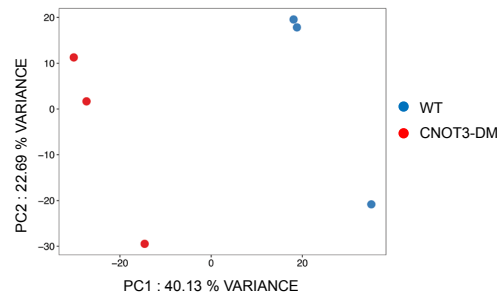

**c**

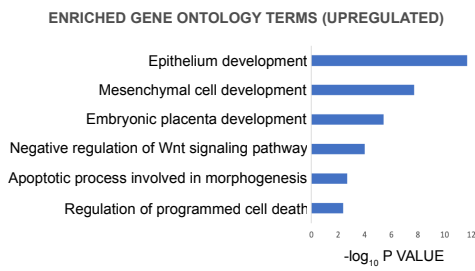

**d**

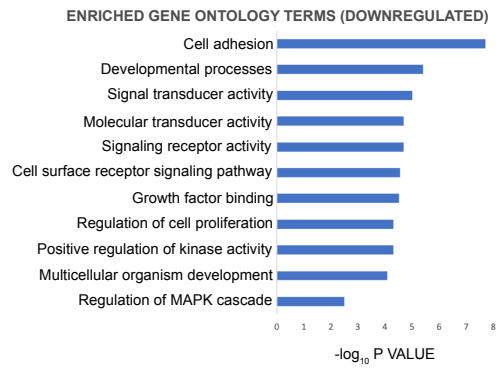

**e**

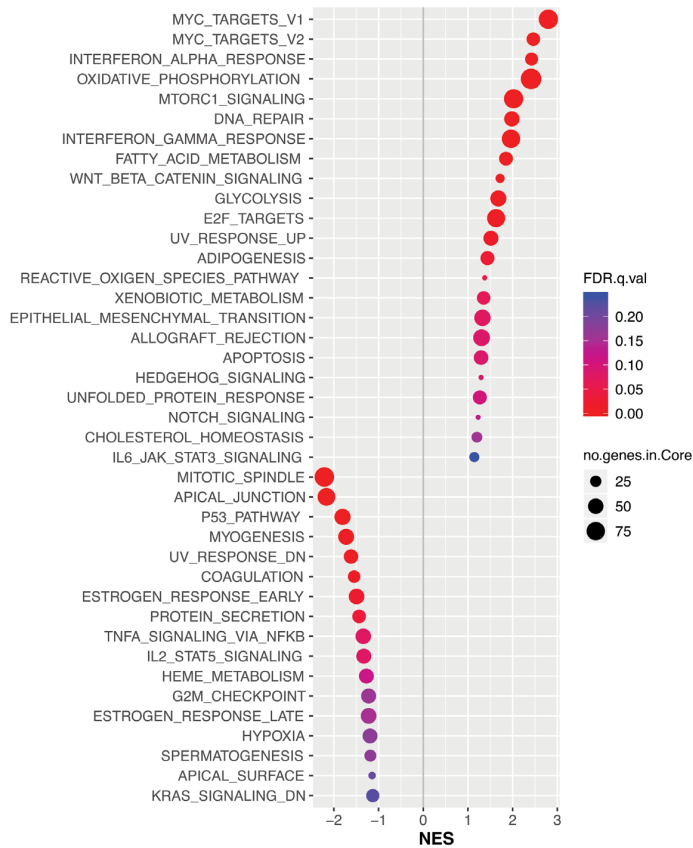



**Supplementary Figure 4: Transcriptome profiling by RNA sequencing in differentiating wild-type and *Cnot3*-DM mesendoderm cells.**

**a. and b.** RNA-seq analysis was used to compare gene expression patterns of ME cells obtained by differentiating wild-type (WT) and *Cnot3*-DM ESCs for 4 days with BMP4 + FGF2, we performed RNA sequencing (RNA-seq) analysis on the wild-type and *Cnot3*-DM cells after 4 days of mesendoderm differentiation. **a.** Volcano plot of RNA-Seq transcriptome data showing differentially expressed genes after 4 days of BMP4 + FGF2 induced mesendoderm differentiation of WT and *Cnot3*-DM ESCs. Fold change ratio >1.5; adjusted P value <0.05. Three biological replicates for each were analyzed.

**b.** Principal component plot of the RNA-seq data showing PC1 and PC2 and the percent variance obtained for each. This reveals separate clustering of the genes that are differentially expressed between the WT and *Cnot3*-DM-derived 4-day differentiated mesendodermal cells.

**c. and d.** Selected gene ontology (GO) profiles obtained out using the GOSep Bioconductor package and showing upregulated genes (**c**) and downregulated genes (**d**), which are involved in signalling pathways that have key roles in developmental processes. Adjusted P value <0.05. **e.** GSEA analysis showing Hallmark gene sets that were significantly altered in the differentiated cells. See also Supplementary Tables 2A and S2B for the differentially regulated genes. The GO and GSEA analysis both showed that expression of genes involved in cell death and apoptosis was upregulated (**c** and **e**). The negative regulator of Wnt signalling *Axin2*, and *TGF $\beta$* , which is part of the apoptosis program, were also elevated. Additionally, the GO analysis revealed downregulation of gene expression programs that are involved in cell adhesion and developmental processes (**d**). The changes included downregulation of signalling molecules such as

Wnt6. Bcl2, a key cell survival factor downstream of ERK signalling was also downregulated.

## SUPPLEMENTARY FIGURE 5

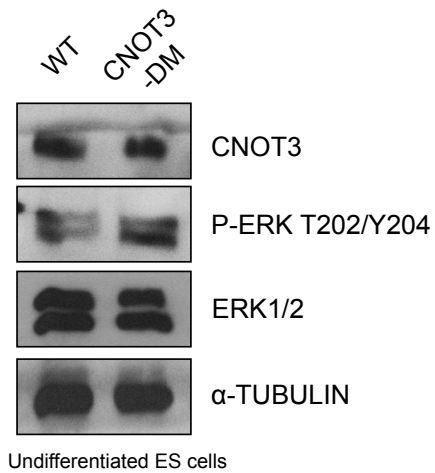

**Supplementary Figure 5: The *CNOT3*-T292A/S294A double mutation does not affect ERK phosphorylation in undifferentiated ESCs.**

Immunoblotting analysis of the indicated proteins from cell extracts prepared from undifferentiated wild-type (WT) and *Cnot3*-DM ESCs.  $\alpha$ -Tubulin was used as a loading control.

# SUPPLEMENTARY FIGURE 6

**a**

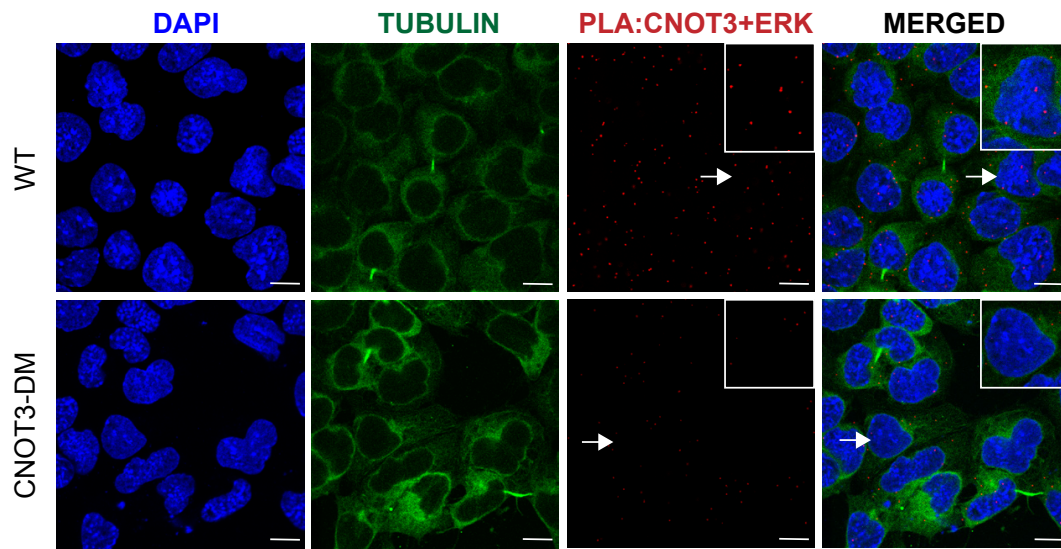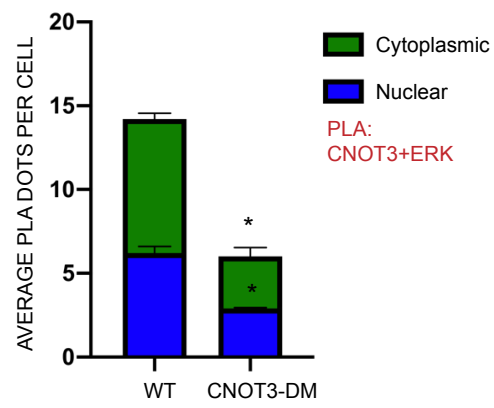

**b**

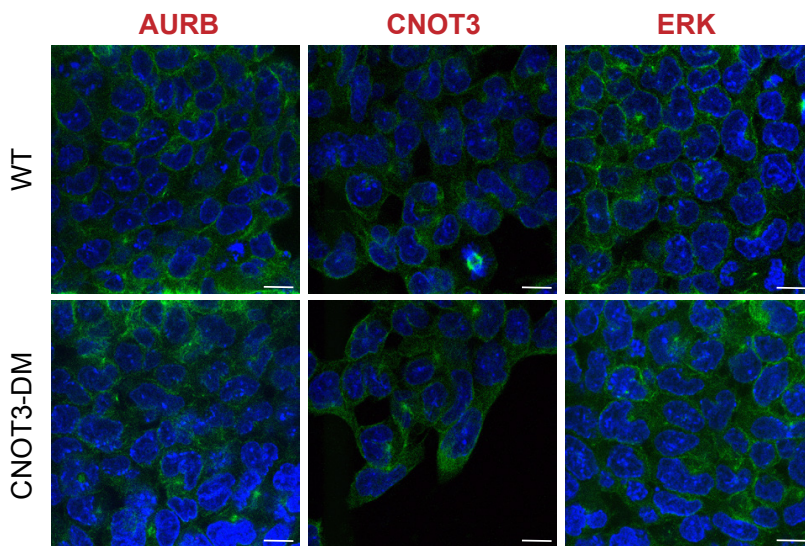

**Supplementary Figure 6: Phosphorylation of CNOT3-T292/S294 alters interaction of CNOT3 with ERK in mesendodermal cells.**

**a.** PLA detection of endogenous interaction between CNOT3 and ERK using a second pair of antibodies (results from the first antibody pair are shown in Figure 7b). Wild-type (WT) and *Cnot3*-DM ESCs were induced to differentiate into mesendodermal cells by incubation for 4 days with BMP4 + FGF2. Positive PLA signals are visible as red dots. Nuclei were counterstained with DAPI and staining for Tubulin was used to mark the cell cytoplasm. Boxed areas represent an enlarged cell indicated by the arrows; scale bar: 10  $\mu$ m. PLA dots were quantified from randomly chosen fields from at least 50 cells for each biological replicate. Histogram represents average interactions per cell (dots per cell) as well as the nuclear and cytoplasmic distribution. Error bars represent the Mean  $\pm$  SEM;  $n=2$ . (P values calculated by unpaired *t*-test, \* $P<0.05$ ).

**b.** Negative control single PLAs conducted with anti-Aurora B only, anti-CNOT3 only or anti-ERK only.

## Supplementary Table 1

List of primers used for qPCR

|                 |                                                                    |
|-----------------|--------------------------------------------------------------------|
| <i>Oct-4</i>    | F-5'-CCAATCAGCTTGGGCTAGAG-3'<br>R-5'-CTGGGAAAGGTGTCCCTGTA-3'       |
| <i>Nanog</i>    | F-5'-TACCTCAGCCTCCAGCAGAT-3'<br>R-5'-GCAATGGATGCTGGGATACT-3'       |
| <i>Sox2</i>     | F-5'-CACAACCTCGGAGATCAGCAA-3'<br>R-5'-CTCCGGGAAGCGTGTACTTA-3'      |
| <i>Sox1</i>     | F-5'-CCTCGGATCTCTGGTCAAGT-3'<br>R-5'-TACAGAGCCGGCAGTCATAC-3'       |
| <i>Fgf5</i>     | F-5'-TCTGGATCTCCTTTGCGTTT-3'<br>R-5'-GGGCTTCGAAAGCACATTTA-3'       |
| <i>Cdx2</i>     | F-5'-TGGTGTACACAGACCATCAGC-3'<br>R-5'-CCTTGGCTCTGCGGTTCT-3'        |
| <i>Tead4</i>    | F-5'-ATCCTGACGGAGGAAGGCA-3'<br>R-5'-GCTTGATATGGCGTGCGAT-3'         |
| <i>Brachury</i> | F-5'-CAGCTGTCGGGGAGCCTGG-3'<br>R-5'-TGCTGCCTGTGAGTCATAAC-3'        |
| <i>Mixl1</i>    | F-5'-AGTTGCTGGAGCTCGTCTTC-3'<br>R-5'-TTCTGGAACCACACCTGGAT-3'       |
| <i>Gata4</i>    | F-5'-TTCCTCTCCCAGGAACATCAA-3'<br>R-5'-GCTGCACAACCTGGGCTCTACTT-3'   |
| <i>Gata6</i>    | F-5'-ACAGCCCACTTCTGTGTTCCC-3'<br>R-5'-GTGGGTTGGTCACGTGGTACAG-3'    |
| <i>Sox17</i>    | F-5'-TTCTGTACACTTTAATGAGGCTGTTC-3'<br>R-5'-TTGTGGGAAGTGGGATCAAG-3' |
| <i>Pdgfr</i>    | F-5'-CTGGTGCCTGCCTCCTATGAC-3'<br>R-5'-CACGATCGTTTCTCCTGCCTTAT-3'   |
| <i>Cxcr4</i>    | F-5'-GAGGCCAAGGAAACTGCTG-3'<br>R-5'-GCGGTCACAGATGTACCTGTC-3'       |
| <i>Mln51 b</i>  | F-5'-ATGACGATGAGGATCGGAAAAAC-3'<br>R-5'-GTCCCCTTGGGTCGGACTTC-3'    |

## Supplementary Table 2A

RNA sequencing: List of genes downregulated in 4-day differentiated mesendoderm cells from *Cnot3*-DM ESCs compared with differentiated wild-type ESCs

| EnsemblID          | baseMean    | log2FoldChange | lfcSE       | stat         | pvalue   | padj        | mg_i_symbol   | entrezgene | chromosome_name |
|--------------------|-------------|----------------|-------------|--------------|----------|-------------|---------------|------------|-----------------|
| ENSMUSG00000053838 | 2482.309155 | -1.157018261   | 0.103489383 | -11.1800672  | 5.11E-29 | 6.73E-25    | Nuded3        | 209586     | 11              |
| ENSMUSG00000026131 | 11067.97424 | -0.717944873   | 0.087807241 | -8.176374302 | 2.93E-16 | 1.93E-12    | Dst           | 13518      | 1               |
| ENSMUSG00000051397 | 1268.069576 | -1.345991691   | 0.168254931 | -7.999716172 | 1.25E-15 | 5.48E-12    | Taestd2       | 56753      | 6               |
| ENSMUSG00000035632 | 1369.952484 | -0.754342986   | 0.112259751 | -6.71962106  | 1.82E-11 | 4.80E-08    | Cnot3         | 232791     | 7               |
| ENSMUSG00000027070 | 15994.48014 | -1.023105892   | 0.156506894 | -6.537129877 | 6.27E-11 | 1.38E-07    | Lrp2          | 14725      | 2               |
| ENSMUSG00000027820 | 1497.443593 | -0.672144989   | 0.108720951 | -6.18229498  | 6.32E-10 | 1.04E-06    | Mme           | 17380      | 3               |
| ENSMUSG00000020758 | 551.3270647 | -1.428458406   | 0.239727538 | -5.958674649 | 2.54E-09 | 3.72E-06    | Itgb4         | 192897     | 11              |
| ENSMUSG00000021061 | 2236.735648 | -0.987576917   | 0.167470576 | -5.897017489 | 3.70E-09 | 4.43E-06    | Spnb1         | 20741      | 12              |
| ENSMUSG00000021182 | 1135.227706 | -0.889362926   | 0.151228429 | -5.880924183 | 4.08E-09 | 4.48E-06    | Ccdc88c       | 68339      | 12              |
| ENSMUSG00000033227 | 256.1050069 | -1.666444604   | 0.288426601 | -5.777707739 | 7.57E-09 | 7.13E-06    | Wnt6          | 22420      | 1               |
| ENSMUSG00000058550 | 274.3457105 | -1.267724031   | 0.220558365 | -5.747793938 | 9.04E-09 | 7.94E-06    | Dppa4         | 73693      | 16              |
| ENSMUSG00000068876 | 3552.371463 | -0.646409155   | 0.114422211 | -5.649332837 | 1.61E-08 | 1.33E-05    | Cgn           | 70737      | 3               |
| ENSMUSG00000032890 | 417.2103962 | -1.026493014   | 0.189289181 | -5.422882633 | 5.86E-08 | 3.86E-05    | Rims3         | 242662     | 4               |
| ENSMUSG00000055737 | 1081.672873 | -0.86646144    | 0.160855145 | -5.386594496 | 7.18E-08 | 4.51E-05    | Ghr           | 14600      | 15              |
| ENSMUSG00000024558 | 729.6436579 | -1.062973842   | 0.198571592 | -5.353101275 | 8.65E-08 | 4.95E-05    | Mapk4         | 225724     | 18              |
| ENSMUSG00000030849 | 1051.836366 | -0.702726847   | 0.131273988 | -5.353130918 | 8.64E-08 | 4.95E-05    | Fgfr2         | 14183      | 7               |
| ENSMUSG00000028444 | 385.1652111 | -1.268432175   | 0.238459807 | -5.31927033  | 1.04E-07 | 5.72E-05    | Cntfr         | 12804      | 4               |
| ENSMUSG00000055533 | 1909.520508 | -0.669193516   | 0.126381111 | -5.295043783 | 1.19E-07 | 6.03E-05    | Igfl1         | 16001      | 7               |
| ENSMUSG00000038677 | 1295.940121 | -0.615258047   | 0.117193208 | -5.249946303 | 1.52E-07 | 7.16E-05    | Scube3        | 268935     | 17              |
| ENSMUSG00000020023 | 934.8247378 | -0.858819039   | 0.16566568  | -5.184049203 | 2.17E-07 | 9.54E-05    | Tmcc3         | 319880     | 10              |
| ENSMUSG00000020340 | 3443.521921 | -0.708241996   | 0.13697307  | -5.170666006 | 2.33E-07 | 9.92E-05    | Cyfp2         | 76884      | 11              |
| ENSMUSG00000031351 | 853.1260034 | -0.633014664   | 0.125310002 | -5.051589292 | 4.38E-07 | 0.000164957 | Zfp185        | 22673      | X               |
| ENSMUSG00000037995 | 2416.855513 | -0.81685748    | 0.161987049 | -5.042733249 | 4.59E-07 | 0.000167981 | Igsf9         | 93842      | 1               |
| ENSMUSG00000026994 | 880.0719507 | -0.688305772   | 0.138261049 | -4.978305742 | 6.41E-07 | 0.000216722 | Galnt3        | 14425      | 2               |
| ENSMUSG00000032087 | 171.7952503 | -1.303279121   | 0.26299458  | -4.955536049 | 7.21E-07 | 0.000237576 | Dscaml1       | 114873     | 9               |
| ENSMUSG00000040728 | 2156.225132 | -0.686425559   | 0.13865033  | -4.950767593 | 7.39E-07 | 0.000237576 | Esrp1         | 207920     | 4               |
| ENSMUSG00000033060 | 1011.747453 | -0.823982468   | 0.169364573 | -4.865140647 | 1.14E-06 | 0.000331632 | Lmo7          | 380928     | 14              |
| ENSMUSG00000025278 | 28303.41362 | -0.638489462   | 0.133540385 | -4.781246229 | 1.74E-06 | 0.00043043  | Flnb          | 286940     | 14              |
| ENSMUSG00000060012 | 870.7055147 | -0.769856835   | 0.161255018 | -4.774157383 | 1.80E-06 | 0.000432352 | Kif13b        | 16554      | 14              |
| ENSMUSG00000019124 | 167.3783846 | -1.12622219    | 0.236238816 | -4.767303728 | 1.87E-06 | 0.000433672 | Scrn1         | 69938      | 6               |
| ENSMUSG00000031555 | 2010.162034 | -0.606640014   | 0.127915057 | -4.742522346 | 2.11E-06 | 0.000455953 | Adam9         | 11502      | 8               |
| ENSMUSG00000052105 | 2114.618465 | -0.719708416   | 0.151746754 | -4.742825767 | 2.11E-06 | 0.000455953 | 1110012J17Rik | 68617      | 17              |
| ENSMUSG00000063531 | 1705.081337 | -0.773504067   | 0.16296105  | -4.746557937 | 2.07E-06 | 0.000455953 | Sema3e        | 20349      | 5               |
| ENSMUSG00000069806 | 565.4159924 | -1.23287421    | 0.259591515 | -4.749285471 | 2.04E-06 | 0.000455953 | Caeng7        | 81904      | 7               |
| ENSMUSG00000027356 | 327.6499736 | -0.936006175   | 0.199234238 | -4.698018697 | 2.63E-06 | 0.000549455 | Fermt1        | 241639     | 2               |
| ENSMUSG00000069045 | 965.6469682 | -0.666732297   | 0.141907633 | -4.698354022 | 2.62E-06 | 0.000549455 | Ddx3y         | 26900      | Y               |
| ENSMUSG00000034640 | 1466.172569 | -0.771791175   | 0.16472797  | -4.685246667 | 2.80E-06 | 0.000575717 | Tiparp        | 99929      | 3               |
| ENSMUSG00000020689 | 438.1493335 | -1.047575528   | 0.228873823 | -4.577087352 | 4.71E-06 | 0.000927296 | Itgb3         | 16416      | 11              |
| ENSMUSG00000031714 | 2662.888399 | -0.620949226   | 0.13615889  | -4.560475093 | 5.10E-06 | 0.000989012 | Gab1          | 14388      | 8               |
| ENSMUSG00000038576 | 971.8499366 | -0.734149212   | 0.161145912 | -4.55580414  | 5.22E-06 | 0.000996593 | Susd4         | 96935      | 1               |
| ENSMUSG00000027500 | 2474.568492 | -0.760402758   | 0.167625832 | -4.536310117 | 5.72E-06 | 0.001047699 | Stmn2         | 20257      | 3               |
| ENSMUSG00000014602 | 6347.665822 | -0.672046889   | 0.14830823  | -4.531420058 | 5.86E-06 | 0.001050004 | Kif1a         | 16560      | 1               |
| ENSMUSG00000022197 | 536.7161592 | -1.135428358   | 0.250790471 | -4.527398318 | 5.97E-06 | 0.001050004 | Pdzd2         | 64870      | 15              |
| ENSMUSG00000021838 | 950.7388304 | -0.72783968    | 0.163150473 | -4.461155797 | 8.15E-06 | 0.001249039 | Samd4         | 78080      | 14              |
| ENSMUSG00000038894 | 2713.782975 | -0.593575131   | 0.133334927 | -4.451760275 | 8.52E-06 | 0.001275312 | Irs2          | 384783     | 8               |
| ENSMUSG00000026475 | 506.5810476 | -0.857809037   | 0.194251907 | -4.415961979 | 1.01E-05 | 0.001440329 | Rgs16         | 19734      | 1               |
| ENSMUSG00000024087 | 196.6400177 | -1.057919511   | 0.240086239 | -4.406414617 | 1.05E-05 | 0.001473241 | Cyp11b1       | 13078      | 17              |
| ENSMUSG00000063450 | 780.7824145 | -0.80544092    | 0.183333086 | -4.393200229 | 1.12E-05 | 0.001516477 | Syne2         | 319565     | 12              |
| ENSMUSG00000018849 | 2406.894801 | -0.618289545   | 0.140949816 | -4.386593493 | 1.15E-05 | 0.001548159 | Wwc1          | 211652     | 11              |
| ENSMUSG00000003134 | 545.792238  | -0.806564009   | 0.184049905 | -4.382311474 | 1.17E-05 | 0.001562962 | Tbcd18        | 54610      | 1               |
| ENSMUSG00000030987 | 1489.503023 | -0.617613927   | 0.141300326 | -4.37093066  | 1.24E-05 | 0.001614092 | Stim1         | 20866      | 7               |
| ENSMUSG00000002799 | 1009.798485 | -0.902324792   | 0.206897161 | -4.361223659 | 1.29E-05 | 0.001631089 | Jag2          | 16450      | 12              |
| ENSMUSG00000019894 | 563.8510355 | -0.996412523   | 0.228527023 | -4.360151859 | 1.30E-05 | 0.001631089 | Slc6a15       | 103098     | 10              |
| ENSMUSG00000025964 | 615.9340152 | -1.14029745    | 0.261821774 | -4.355243006 | 1.33E-05 | 0.001652338 | Adam23        | 23792      | 1               |
| ENSMUSG00000035969 | 1103.178194 | -0.840883566   | 0.195231645 | -4.307106897 | 1.65E-05 | 0.001999564 | Rusc2         | 100213     | 4               |
| ENSMUSG00000043388 | 249.7067451 | -0.859913321   | 0.19982516  | -4.303328567 | 1.68E-05 | 0.002015495 | Tmem130       | 243339     | 5               |
| ENSMUSG00000054452 | 1401.893304 | -0.66899182    | 0.156862142 | -4.264839248 | 2.00E-05 | 0.002353579 | Aes           | 14797      | 10              |
| ENSMUSG00000047986 | 679.8603921 | -0.723217059   | 0.169864064 | -4.257622479 | 2.07E-05 | 0.002409321 | Palm3         | 74337      | 8               |
| ENSMUSG00000051554 | 695.1761078 | -0.607316475   | 0.143730516 | -4.225382958 | 2.39E-05 | 0.002686472 | Gm9853        | NA         | 8               |
| ENSMUSG00000028337 | 359.330846  | -1.021700227   | 0.242006778 | -4.221783523 | 2.42E-05 | 0.00270661  | Coro2a        | 107684     | 4               |
| ENSMUSG00000051375 | 967.1463979 | -0.712646204   | 0.1707267   | -4.174193053 | 2.99E-05 | 0.003244822 | Pcdh1         | 75599      | 18              |
| ENSMUSG00000024462 | 674.5916187 | -0.645406109   | 0.155782016 | -4.143007814 | 3.43E-05 | 0.003556548 | Gabrr1        | 54393      | 17              |
| ENSMUSG00000024998 | 175.4173074 | -1.039560284   | 0.252840762 | -4.111521713 | 3.93E-05 | 0.003863474 | Plec1         | 74055      | 19              |
| ENSMUSG00000043857 | 226.4472698 | -0.965228876   | 0.234854161 | -4.109907492 | 3.96E-05 | 0.003863474 | Mgat5b        | 268510     | 11              |
| ENSMUSG00000037860 | 103.9223025 | -1.767514188   | 0.430391727 | -4.106756883 | 4.01E-05 | 0.00388773  | Aim2          | 383619     | 1               |
| ENSMUSG00000063972 | 2760.551781 | -0.669917041   | 0.163954442 | -4.08599506  | 4.39E-05 | 0.004160549 | Nr6a1         | 14536      | 2               |
| ENSMUSG00000019851 | 2176.298047 | -0.58876614    | 0.144669479 | -4.069732905 | 4.71E-05 | 0.004398601 | Perp          | 64058      | 10              |
| ENSMUSG00000020467 | 533.7516377 | -0.642716971   | 0.159622143 | -4.026490065 | 5.66E-05 | 0.005040704 | Efemp1        | 216616     | 11              |
| ENSMUSG00000027171 | 736.1395379 | -0.878354678   | 0.218510077 | -4.019744497 | 5.83E-05 | 0.005099059 | Prrg4         | 228413     | 2               |
| ENSMUSG00000028412 | 2407.111743 | -0.666148379   | 0.165826744 | -4.01713476  | 5.89E-05 | 0.005099059 | Slc44a1       | 100434     | 4               |
| ENSMUSG00000018166 | 2057.274688 | -0.775810034   | 0.19395593  | -3.999929433 | 6.34E-05 | 0.005285231 | Erb3          | 13867      | 10              |
| ENSMUSG00000034275 | 259.8939048 | -0.829067627   | 0.208882964 | -3.969053348 | 7.22E-05 | 0.005869355 | Igsf9b        | 235086     | 9               |
| ENSMUSG00000032735 | 60.9293543  | -1.713530065   | 0.433696632 | -3.950987713 | 7.78E-05 | 0.006154372 | Ablim3        | 319713     | 18              |
| ENSMUSG00000059713 | 536.6261686 | -0.779744854   | 0.197399062 | -3.950094027 | 7.81E-05 | 0.006154372 | Rcan3         | 53902      | 4               |
| ENSMUSG00000056608 | 853.0200053 | -0.687715046   | 0.174606548 | -3.938655539 | 8.19E-05 | 0.006314131 | Chd9          | 109151     | 8               |

|                    |             |              |             |              |             |             |            |        |    |
|--------------------|-------------|--------------|-------------|--------------|-------------|-------------|------------|--------|----|
| ENSMUSG00000032363 | 306.8802662 | -0.755066597 | 0.192708221 | -3.91818571  | 8.92E-05    | 0.006774951 | Adams7     | 108153 | 9  |
| ENSMUSG00000044279 | 992.0536055 | -0.643750759 | 0.164325804 | -3.917526916 | 8.95E-05    | 0.006774951 | Cr3        | 224912 | 17 |
| ENSMUSG00000024544 | 132.3469829 | -1.071625592 | 0.273919661 | -3.9121894   | 9.15E-05    | 0.006847782 | D18Ert653e | 52662  | 18 |
| ENSMUSG00000064043 | 561.5700864 | -0.700442376 | 0.181080778 | -3.868121086 | 0.000109677 | 0.007854437 | Trerf1     | 224829 | 17 |
| ENSMUSG00000046329 | 665.4264395 | -0.749739986 | 0.194180655 | -3.86104366  | 0.000112904 | 0.007916315 | Slc25a23   | 66972  | 17 |
| ENSMUSG00000033826 | 496.3531197 | -0.812364539 | 0.213298814 | -3.808575045 | 0.00013977  | 0.009294436 | Dnae8      | 13417  | 17 |
| ENSMUSG00000042078 | 365.0013455 | -0.829522031 | 0.21870893  | -3.792812811 | 0.00014895  | 0.009621176 | Svop       | 68666  | 5  |
| ENSMUSG00000030790 | 158.2585987 | -1.098491613 | 0.290360693 | -3.783196696 | 0.000154827 | 0.009855821 | Adm        | 11535  | 7  |
| ENSMUSG00000017009 | 1374.71206  | -0.757035729 | 0.200182926 | -3.781719761 | 0.000155749 | 0.009866826 | Sdc4       | 20971  | 2  |
| ENSMUSG00000046447 | 233.812982  | -0.817692999 | 0.216319928 | -3.780016972 | 0.000156818 | 0.009887016 | Camk2n1    | 66259  | 4  |
| ENSMUSG00000001870 | 437.9258165 | -0.708633541 | 0.187694492 | -3.775462632 | 0.000159711 | 0.010021483 | Ltbp1      | 268977 | 17 |
| ENSMUSG00000027931 | 249.2730371 | -0.872746922 | 0.231814228 | -3.764854863 | 0.000166646 | 0.010407073 | Npr1       | 18160  | 3  |
| ENSMUSG00000049281 | 180.3654356 | -1.239350705 | 0.330300893 | -3.752186962 | 0.000175299 | 0.010766033 | Scn3b      | 235281 | 9  |
| ENSMUSG00000022206 | 87.22724761 | -1.829579116 | 0.488230497 | -3.747367536 | 0.0001787   | 0.010801522 | Npr3       | 18162  | 15 |
| ENSMUSG00000038453 | 147.8639665 | -1.148541121 | 0.306461568 | -3.74774928  | 0.000178428 | 0.010801522 | Srcin1     | 56013  | 11 |
| ENSMUSG00000027330 | 569.172035  | -0.792611094 | 0.213164755 | -3.718302753 | 0.000200566 | 0.011847737 | Cdc25b     | 12531  | 2  |
| ENSMUSG00000002228 | 227.0677094 | -0.961737216 | 0.26041732  | -3.693061638 | 0.00022157  | 0.012494774 | Ppm1j      | 71887  | 3  |
| ENSMUSG00000017737 | 547.2662676 | -0.916496152 | 0.248191273 | -3.692700964 | 0.000221885 | 0.012494774 | Mmp9       | 17395  | 2  |
| ENSMUSG00000027536 | 485.6112117 | -0.631446152 | 0.171056774 | -3.691441958 | 0.000222986 | 0.012503363 | Chmp4c     | 66371  | 3  |
| ENSMUSG00000040274 | 390.2504138 | -0.657073286 | 0.178068502 | -3.690002891 | 0.000224252 | 0.012521026 | Cdk6       | 12571  | 5  |
| ENSMUSG00000051455 | 134.9582589 | -0.940910356 | 0.255694969 | -3.679815676 | 0.000233403 | 0.012922462 | Gm1564     | 268491 | 11 |
| ENSMUSG00000056602 | 274.0242929 | -0.706148426 | 0.193266208 | -3.653760442 | 0.000258427 | 0.013956139 | Fry        | 320365 | 5  |
| ENSMUSG00000034593 | 1834.62353  | -0.599763067 | 0.164417084 | -3.647814761 | 0.00026448  | 0.014052644 | Myo5a      | 17918  | 9  |
| ENSMUSG00000053559 | 264.8760246 | -0.87769918  | 0.240919945 | -3.643115479 | 0.000269358 | 0.014254335 | Smagp      | 207818 | 15 |
| ENSMUSG00000003008 | 435.7158043 | -0.883801225 | 0.243203177 | -3.634003616 | 0.000279057 | 0.014649934 | Kcmt1      | 12716  | 2  |
| ENSMUSG00000039137 | 591.311762  | -0.657287931 | 0.181182373 | -3.62776974  | 0.00028588  | 0.014889491 | Whrn       | 73750  | 4  |
| ENSMUSG00000032878 | 148.4474587 | -0.935040212 | 0.259084382 | -3.609018055 | 0.000307358 | 0.015820544 | Ccdc85a    | 216613 | 11 |
| ENSMUSG00000019796 | 766.1803887 | -0.632285722 | 0.175370027 | -3.605437782 | 0.000311627 | 0.015915934 | Lrp11      | 237253 | 10 |
| ENSMUSG00000021457 | 209.2378261 | -1.05299028  | 0.291994231 | -3.606202339 | 0.000310711 | 0.015915934 | Syk        | 20963  | 13 |
| ENSMUSG00000044976 | 247.7723701 | -0.948932459 | 0.263811167 | -3.597013992 | 0.000321891 | 0.016313692 | Wdr72      | 546144 | 9  |
| ENSMUSG00000039601 | 211.7875114 | -1.092139341 | 0.304249505 | -3.589617479 | 0.000331164 | 0.016592176 | Rcan2      | 53901  | 17 |
| ENSMUSG00000026880 | 461.2632667 | -0.82873851  | 0.232524446 | -3.564091966 | 0.000365118 | 0.017368805 | Stom       | 13830  | 2  |
| ENSMUSG00000040488 | 837.778164  | -0.809664275 | 0.227465039 | -3.559510859 | 0.000371546 | 0.017592759 | Ltbp4      | 108075 | 7  |
| ENSMUSG00000020020 | 143.9897749 | -1.125683025 | 0.316725345 | -3.554129925 | 0.000379232 | 0.017669951 | Usp44      | 327799 | 10 |
| ENSMUSG00000042195 | 1106.085107 | -0.682537728 | 0.192144199 | -3.552216165 | 0.000382001 | 0.017724035 | Slc35f2    | 72022  | 9  |
| ENSMUSG00000029426 | 805.7365456 | -0.599074078 | 0.168825938 | -3.548471796 | 0.000387473 | 0.017914871 | Scarb2     | 12492  | 5  |
| ENSMUSG00000027381 | 1222.559113 | -0.642446121 | 0.182407785 | -3.522032357 | 0.000428252 | 0.019325599 | Bcl2l11    | 12125  | 2  |
| ENSMUSG00000034855 | 346.356108  | -0.747186606 | 0.212318964 | -3.519170368 | 0.000432899 | 0.019374865 | Cxcl10     | 15945  | 5  |
| ENSMUSG00000023232 | 140.1410526 | -1.017096121 | 0.291118083 | -3.493005091 | 0.000477617 | 0.02077084  | Serinc2    | 230779 | 4  |
| ENSMUSG00000021822 | 460.072347  | -0.682484879 | 0.196795947 | -3.467982393 | 0.000524382 | 0.022434341 | Plau       | 18792  | 14 |
| ENSMUSG00000040669 | 3905.628905 | -0.596426091 | 0.173603367 | -3.435567536 | 0.000591314 | 0.02427335  | Phe1       | 13619  | 6  |
| ENSMUSG00000029151 | 136.2532322 | -1.286979216 | 0.37696161  | -3.414085633 | 0.000639965 | 0.02540004  | Slc30a3    | 22784  | 5  |
| ENSMUSG00000046314 | 323.5852831 | -0.597445954 | 0.175156452 | -3.410927472 | 0.000647423 | 0.025542198 | Stxbp6     | 217517 | 12 |
| ENSMUSG00000028583 | 1106.222368 | -0.618995315 | 0.181737601 | -3.40598374  | 0.000659261 | 0.025701429 | Pdpr       | 14726  | 4  |
| ENSMUSG00000015094 | 435.8115648 | -0.601991886 | 0.177201287 | -3.397220735 | 0.00068074  | 0.026382691 | Npdc1      | 18146  | 2  |
| ENSMUSG00000074796 | 515.7895946 | -0.818326069 | 0.241660001 | -3.386270239 | 0.000708496 | 0.026904465 | Slc4a11    | 269356 | 2  |
| ENSMUSG00000019864 | 523.1608831 | -0.617201861 | 0.183421566 | -3.36493616  | 0.000765614 | 0.027868762 | Rtn4ip1    | 170728 | 10 |
| ENSMUSG00000003282 | 371.9772629 | -0.602278117 | 0.180142276 | -3.343346889 | 0.000827744 | 0.029399399 | Plag1      | 56711  | 4  |
| ENSMUSG00000026359 | 910.8963245 | -0.779017285 | 0.233357962 | -3.338293149 | 0.000842948 | 0.029623913 | Arrdc4     | 66412  | 7  |
| ENSMUSG00000074923 | 140.1519969 | -1.109560024 | 0.335239856 | -3.309749738 | 0.000933794 | 0.031550273 | Pak6       | 214230 | 2  |
| ENSMUSG00000042978 | 766.2424091 | -0.641193459 | 0.193772785 | -3.308996454 | 0.00093631  | 0.031554373 | Sbk1       | 104175 | 7  |
| ENSMUSG00000020583 | 234.7025681 | -1.025261674 | 0.312091576 | -3.285130882 | 0.00101935  | 0.033247466 | Matn3      | 17182  | 12 |
| ENSMUSG00000048915 | 269.4119682 | -0.606089225 | 0.184902421 | -3.277886908 | 0.001045873 | 0.033861098 | Efnf5      | 13640  | 17 |
| ENSMUSG00000057329 | 161.7421936 | -0.92519922  | 0.282969476 | -3.269607855 | 0.001076967 | 0.034528444 | Bcl2       | 12043  | 1  |
| ENSMUSG00000027238 | 219.8192346 | -1.035001357 | 0.317780842 | -3.256965867 | 0.0011261   | 0.03566975  | Frmf5      | 228564 | 2  |
| ENSMUSG00000040152 | 1293.2347   | -0.914793522 | 0.281635764 | -3.248144019 | 0.001161605 | 0.036206822 | Thbs1      | 21825  | 2  |
| ENSMUSG00000047793 | 181.0622527 | -0.910896221 | 0.281189357 | -3.239440609 | 0.001197644 | 0.036855036 | Sned1      | 208777 | 1  |
| ENSMUSG00000056476 | 523.7232778 | -0.589617918 | 0.182059933 | -3.238592408 | 0.001201211 | 0.036855036 | Med12l     | 329650 | 3  |
| ENSMUSG00000018554 | 312.8843707 | -0.850302513 | 0.262692272 | -3.236876771 | 0.001208456 | 0.03687614  | Ybx2       | 53422  | 11 |
| ENSMUSG00000024883 | 352.7993191 | -0.708711081 | 0.219011592 | -3.235952374 | 0.001212376 | 0.036894873 | Rin1       | 225870 | 19 |
| ENSMUSG00000039238 | 143.5878287 | -0.98972657  | 0.307157331 | -3.22221373  | 0.001272042 | 0.037836791 | Zfp750     | 319530 | 11 |
| ENSMUSG00000036225 | 257.6241029 | -0.711846438 | 0.221128006 | -3.219160021 | 0.001285667 | 0.038155938 | Kctd1      | 106931 | 18 |
| ENSMUSG00000031284 | 160.7919775 | -0.889432342 | 0.277167235 | -3.209009692 | 0.00133193  | 0.039175986 | Pak3       | 18481  | X  |
| ENSMUSG00000032251 | 503.1594631 | -0.668634313 | 0.208496249 | -3.206936884 | 0.001341564 | 0.039238495 | Irak1bp1   | 65099  | 9  |
| ENSMUSG00000028789 | 608.8495129 | -0.678086113 | 0.211735774 | -3.202510843 | 0.001362352 | 0.039256702 | Adc        | 242669 | 4  |
| ENSMUSG00000015944 | 525.6287015 | -0.751380015 | 0.234709847 | -3.201314416 | 0.001368022 | 0.03927325  | Gatsl2     | 80909  | 5  |
| ENSMUSG00000029314 | 483.1082236 | -0.632702441 | 0.197701589 | -3.200290112 | 0.001372893 | 0.039327421 | Agpat9     | 231510 | 5  |
| ENSMUSG00000043415 | 431.8541099 | -0.694380959 | 0.21709059  | -3.198576961 | 0.001381077 | 0.039395078 | Otd1       | 71198  | 2  |
| ENSMUSG00000024302 | 112.2464352 | -1.375191189 | 0.43247554  | -3.179812639 | 0.001473703 | 0.041141917 | Dna        | 13527  | 18 |
| ENSMUSG00000061451 | 96.30824115 | -1.302076757 | 0.410152798 | -3.174613857 | 0.00150036  | 0.041447056 | Tmem151a   | 381199 | 19 |
| ENSMUSG00000019256 | 537.2204281 | -0.641109308 | 0.202945557 | -3.159021159 | 0.001583    | 0.042832014 | Ahr        | 11622  | 12 |
| ENSMUSG00000041703 | 786.1848823 | -0.692415194 | 0.219274804 | -3.157750826 | 0.001589914 | 0.042924203 | Zic5       | 65100  | 14 |
| ENSMUSG00000026463 | 370.6140132 | -0.825209385 | 0.261564195 | -3.154901933 | 0.001605521 | 0.043175398 | Atp2b4     | 381290 | 1  |
| ENSMUSG00000037846 | 268.9204955 | -0.85917001  | 0.273521703 | -3.14114017  | 0.001682915 | 0.044529652 | Rtkn2      | 170799 | 10 |
| ENSMUSG00000069170 | 89.53057658 | -1.195016711 | 0.381363337 | -3.133538535 | 0.001727122 | 0.045038854 | Gpr98      | 110789 | 13 |
| ENSMUSG00000015312 | 3254.58288  | -0.601931231 | 0.192217506 | -3.131510981 | 0.001739093 | 0.045110288 | Gadd45b    | 17873  | 10 |
| ENSMUSG00000022101 | 95.66484114 | -0.925418559 | 0.296748311 | -3.118530161 | 0.001817555 | 0.046504713 | Fgf17      | 14171  | 14 |
| ENSMUSG00000034656 | 312.0232071 | -0.629091519 | 0.202390855 | -3.108300122 | 0.001881669 | 0.047774084 | Cacla1a    | 12286  | 8  |
| ENSMUSG00000032625 | 303.023047  | -0.827390575 | 0.266676388 | -3.102601557 | 0.001918277 | 0.048138771 | Thsd7a     | 330267 | 6  |
| ENSMUSG00000085328 | 1123.856096 | -0.627964356 | 0.202432769 | -3.10208845  | 0.001921605 | 0.048138771 | Gm17131    | NA     | 5  |



## Supplementary Table 2B

RNA sequencing: List of genes upregulated in 4-day differentiated mesendoderm cells from *Cnot3*-DM ESCs compared with differentiated wild-type ESCs

| EnsemblID            | baseMean    | log2FoldChange | lfcSE       | stat        | pvalue      | padj        | mg_i_symbol   | entrezgene | chromosome_name |
|----------------------|-------------|----------------|-------------|-------------|-------------|-------------|---------------|------------|-----------------|
| ENSMUSG00000007097   | 283.3887789 | 1.449134136    | 0.200865927 | 7.214434828 | 5.42E-13    | 1.78E-09    | Atp1a2        | 98660      | 1               |
| ENSMUSG000000086266  | 242.2075032 | 1.826247063    | 0.285839193 | 6.389071569 | 1.67E-10    | 3.14E-07    | Igf2as        | NA         | 7               |
| ENSMUSG000000063229  | 14267.07335 | 0.730361982    | 0.123370722 | 5.920059245 | 3.22E-09    | 4.24E-06    | Ldha          | 16828      | 7               |
| ENSMUSG000000052396  | 532.129582  | 0.972038727    | 0.167788707 | 5.793230945 | 6.90E-09    | 7.00E-06    | Mogat2        | 233549     | 7               |
| ENSMUSG000000040856  | 182.8880384 | 1.950298475    | 0.349569919 | 5.579137013 | 2.42E-08    | 1.81E-05    | Dlk1          | 13386      | 12              |
| ENSMUSG000000061723  | 77.28008179 | 2.8924795      | 0.545377262 | 5.303630539 | 1.14E-07    | 5.98E-05    | Tntt3         | 21957      | 7               |
| ENSMUSG000000021403  | 239.9507425 | 1.621103129    | 0.310118623 | 5.227364661 | 1.72E-07    | 7.81E-05    | Serpinc9b     | 20706      | 13              |
| ENSMUSG000000007872  | 1876.535247 | 0.892355993    | 0.173750694 | 5.135841321 | 2.81E-07    | 0.000112158 | Id3           | 15903      | 4               |
| ENSMUSG000000048528  | 47.44919983 | 3.515357332    | 0.683742816 | 5.141344446 | 2.73E-07    | 0.000112158 | Nkx1-2        | 20231      | 7               |
| ENSMUSG000000042745  | 1672.038251 | 0.848185828    | 0.167880816 | 5.05230942  | 4.36E-07    | 0.000164957 | Id1           | 15901      | 2               |
| ENSMUSG000000035960  | 2107.286392 | 0.711616606    | 0.141882113 | 5.015548401 | 5.29E-07    | 0.000188333 | Apex1         | 11792      | 14              |
| ENSMUSG000000024657  | 171.6114202 | 1.974201467    | 0.396227498 | 4.828494844 | 6.28E-07    | 0.000216722 | Sall3         | 20689      | 18              |
| ENSMUSG000000024232  | 752.2929805 | 1.153132173    | 0.235330684 | 4.900050228 | 9.58E-07    | 0.000300599 | Bambi         | 68010      | 18              |
| ENSMUSG000000198446  | 341.7072104 | 1.067727329    | 0.218291102 | 4.891300292 | 1.00E-06    | 0.000306969 | Lama4         | 16775      | 10              |
| ENSMUSG000000030041  | 156.1775192 | 1.165738862    | 0.238972297 | 4.878133896 | 1.07E-06    | 0.000320723 | D6Mmm5e       | 110958     | 6               |
| ENSMUSG000000011256  | 1238.676473 | 0.638469088    | 0.131298154 | 4.862742318 | 1.16E-06    | 0.000331632 | Adam19        | 11492      | 11              |
| ENSMUSG000000021613  | 31.82754114 | 2.978984914    | 0.614289898 | 4.849477297 | 1.24E-06    | 0.00034261  | Hapl1         | 12950      | 13              |
| ENSMUSG000000027009  | 59.42934805 | 2.673006928    | 0.551379214 | 4.847855818 | 1.25E-06    | 0.00034261  | Itga4         | 16401      | 2               |
| ENSMUSG000000039239  | 1388.027084 | 0.778529949    | 0.161102813 | 4.832503745 | 1.35E-06    | 0.000351685 | Tgfb2         | 21808      | 1               |
| ENSMUSG000000043342  | 60.05455736 | 2.405457026    | 0.497961359 | 4.830609811 | 1.36E-06    | 0.000351685 | Hoxd9         | 15438      | 2               |
| ENSMUSG000000042617  | 109.6058058 | 1.979187385    | 0.414164643 | 4.778745404 | 1.76E-06    | 0.00043043  | Ccno          | 218630     | 13              |
| ENSMUSG000000015053  | 126.4464755 | 1.563911628    | 0.328115223 | 4.766348894 | 1.88E-06    | 0.000433672 | Gata2         | 14461      | 6               |
| ENSMUSG000000020388  | 202.5452985 | 1.646249561    | 0.353130359 | 4.661874915 | 3.13E-06    | 0.000635216 | Pdlim4        | 30794      | 11              |
| ENSMUSG0000000022664 | 7319.351693 | 0.695393563    | 0.153115136 | 4.541638275 | 5.58E-06    | 0.001047699 | Slc38a4       | 69354      | 15              |
| ENSMUSG000000030022  | 653.6365516 | 0.820953259    | 0.181391176 | 4.525872085 | 6.01E-06    | 0.001050004 | Adams9        | 101401     | 6               |
| ENSMUSG000000032221  | 259.278792  | 1.200599853    | 0.265359727 | 4.524423759 | 6.06E-06    | 0.001050004 | Mns1          | 17427      | 9               |
| ENSMUSG000000051851  | 174.4324088 | 1.693380282    | 0.374948169 | 4.516304978 | 6.29E-06    | 0.001076886 | Cxcl1c        | 72865      | X               |
| ENSMUSG00000006386   | 51.51781704 | 1.952076191    | 0.434110779 | 4.496723617 | 6.90E-06    | 0.001165803 | Tek           | 21687      | 4               |
| ENSMUSG000000026728  | 6644.127629 | 0.876829377    | 0.195192869 | 4.492117883 | 7.05E-06    | 0.001176229 | Vim           | 22352      | 2               |
| ENSMUSG000000028766  | 230.0251879 | 1.408415984    | 0.313732949 | 4.489219218 | 7.15E-06    | 0.001177442 | Alpl          | 11647      | 4               |
| ENSMUSG000000036377  | 893.439453  | 0.98638567     | 0.21989239  | 4.485765384 | 7.27E-06    | 0.001181906 | C530008M17Rik | 320827     | 5               |
| ENSMUSG000000033880  | 130.3966982 | 1.339929887    | 0.299409948 | 4.475235028 | 7.63E-06    | 0.001217489 | Lgals3bp      | 19039      | 11              |
| ENSMUSG0000000072035 | 107.5336986 | 1.462818247    | 0.327422718 | 4.467674862 | 7.91E-06    | 0.001225839 | Rps6kl1       | 238323     | 12              |
| ENSMUSG000000085795  | 386.3765089 | 0.884719146    | 0.198607832 | 4.454603505 | 8.40E-06    | 0.001272995 | Zfp703        | 353310     | 8               |
| ENSMUSG000000039231  | 1360.553905 | 0.676627841    | 0.152485794 | 4.437317224 | 9.11E-06    | 0.001333615 | Suv39h1       | 20937      | X               |
| ENSMUSG000000031073  | 146.312395  | 2.320222907    | 0.524376388 | 4.424728039 | 9.66E-06    | 0.001398266 | Fgf15         | 14170      | 7               |
| ENSMUSG000000061082  | 102.4369856 | 2.178612466    | 0.495416156 | 4.397540211 | 1.09E-05    | 0.00150279  | Plac1         | 56096      | X               |
| ENSMUSG000000042436  | 67.17036567 | 1.876224146    | 0.428404791 | 4.379559205 | 1.19E-05    | 0.001567004 | Mfap4         | 76293      | 11              |
| ENSMUSG000000043445  | 518.6094127 | 0.677682134    | 0.155357573 | 4.362079821 | 1.29E-05    | 0.001631089 | Pgp           | 67078      | 7               |
| ENSMUSG000000025665  | 3751.887593 | 0.805315731    | 0.185737593 | 4.335771343 | 1.45E-05    | 0.001788745 | Rps6ka6       | 67071      | X               |
| ENSMUSG000000070348  | 3039.659451 | 0.700859532    | 0.163380147 | 4.289747231 | 1.79E-05    | 0.002123475 | Cend1         | 12443      | 7               |
| ENSMUSG000000037664  | 1709.113048 | 0.736383655    | 0.173329578 | 4.248459278 | 2.15E-05    | 0.002487977 | Cdkn1c        | 12577      | 7               |
| ENSMUSG000000025969  | 1081.150516 | 0.921039795    | 0.217007418 | 4.244277936 | 2.19E-05    | 0.002512778 | Nrp2          | 18187      | 1               |
| ENSMUSG000000031891  | 20.72393859 | 3.045214588    | 0.7195039   | 4.232380935 | 2.31E-05    | 0.002626657 | Hsd11b2       | 15484      | 8               |
| ENSMUSG000000001657  | 19.15229534 | 3.781989211    | 0.906268359 | 4.173144936 | 3.00E-05    | 0.003244822 | Hoxc8         | 15426      | 15              |
| ENSMUSG000000027669  | 259.899371  | 1.046158548    | 0.250495145 | 4.176362572 | 2.96E-05    | 0.003244822 | Gnb4          | 14696      | 3               |
| ENSMUSG000000025776  | 117.1059428 | 1.575001062    | 0.377629575 | 4.170756652 | 3.04E-05    | 0.003247022 | Crispld1      | 83691      | 1               |
| ENSMUSG000000031074  | 96.12088287 | 2.14042192     | 0.513378556 | 4.169285789 | 3.06E-05    | 0.003247022 | Fgf3          | 14174      | 7               |
| ENSMUSG000000023484  | 217.609032  | 1.067365499    | 0.256237514 | 4.165531754 | 3.11E-05    | 0.003274513 | Prph          | 19132      | 15              |
| ENSMUSG000000029646  | 316.2348609 | 2.510042416    | 0.606294098 | 4.139975015 | 3.47E-05    | 0.00357574  | Cdx2          | 12591      | 5               |
| ENSMUSG000000031963  | 119.5038363 | 1.700607264    | 0.411889804 | 4.128791849 | 3.65E-05    | 0.003696395 | Bmper         | 73230      | 9               |
| ENSMUSG000000036523  | 439.6896435 | 0.957871636    | 0.233020854 | 4.110669148 | 3.95E-05    | 0.003863474 | Greb1         | 268527     | 12              |
| ENSMUSG000000028369  | 74.27939726 | 1.9939375      | 0.48661602  | 4.097558278 | 4.18E-05    | 0.003986817 | Svep1         | 64817      | 4               |
| ENSMUSG000000070407  | 298.6815831 | 1.351693942    | 0.333165015 | 4.057130495 | 4.97E-05    | 0.004581984 | Hs3st3b1      | 54710      | 11              |
| ENSMUSG00000005087   | 800.4529198 | 0.606755231    | 0.150575241 | 4.029581665 | 5.59E-05    | 0.005040704 | Cd44          | 12505      | 2               |
| ENSMUSG000000033350  | 96.85296273 | 1.666840896    | 0.414939591 | 4.017068823 | 5.89E-05    | 0.005099059 | Chst2         | 54371      | 9               |
| ENSMUSG000000027736  | 39.68508716 | 2.111008534    | 0.525655601 | 4.015953662 | 5.92E-05    | 0.005099059 | Oas1a         | 246730     | 5               |
| ENSMUSG000000031217  | 675.576237  | 0.839185623    | 0.209316302 | 4.009174705 | 6.09E-05    | 0.005213585 | Efnb1         | 13641      | X               |
| ENSMUSG000000038507  | 328.3227396 | 1.150761133    | 0.287318155 | 4.005180722 | 6.20E-05    | 0.005252179 | Parp12        | 243771     | 6               |
| ENSMUSG000000031734  | 62.2475798  | 1.549274621    | 0.387329704 | 3.999885898 | 6.34E-05    | 0.005285231 | Irx3          | 16373      | 8               |
| ENSMUSG000000025105  | 43.95377984 | 1.930103703    | 0.485787627 | 3.973142981 | 7.09E-05    | 0.005841565 | Bnc1          | 12173      | 7               |
| ENSMUSG000000040212  | 127.1896627 | 1.203376346    | 0.30317857  | 3.969199895 | 7.21E-05    | 0.005869355 | Emp3          | 13732      | 7               |
| ENSMUSG000000079197  | 2904.588691 | 0.642758069    | 0.162198453 | 3.962787905 | 7.41E-05    | 0.00598863  | Psme2         | 19188      | 14              |
| ENSMUSG000000057615  | 73.76704192 | 1.408899552    | 0.356770098 | 3.949040459 | 7.85E-05    | 0.006154372 | Ldoc1         | 434784     | X               |
| ENSMUSG000000031486  | 816.9286127 | 1.566821883    | 0.397424434 | 3.942439745 | 8.07E-05    | 0.00625186  | Gpr124        | 78560      | 8               |
| ENSMUSG000000050335  | 391.4408762 | 1.075879857    | 0.27329916  | 3.936637998 | 8.26E-05    | 0.006330408 | Rftn1         | 76438      | 17              |
| ENSMUSG000000037169  | 1248.113109 | 0.724279625    | 0.185039421 | 3.914190948 | 9.07E-05    | 0.006830041 | Mycn          | 18109      | 12              |
| ENSMUSG000000031075  | 47.85274647 | 2.063109925    | 0.532534201 | 3.874136012 | 0.000107004 | 0.007747181 | Ano1          | 101772     | 7               |
| ENSMUSG000000026104  | 300.186188  | 0.986070243    | 0.255395368 | 3.860955862 | 0.000112944 | 0.007916315 | Stat1         | 20846      | 1               |
| ENSMUSG000000062393  | 504.1113151 | 1.008835461    | 0.261997839 | 3.85054879  | 0.000117853 | 0.008216693 | Dgkk          | 331374     | X               |
| ENSMUSG000000054075  | 56.35084834 | 2.241177558    | 0.583478525 | 3.841062629 | 0.000122503 | 0.008363835 | Igfp1         | 60440      | 18              |
| ENSMUSG000000050333  | 399.0295382 | 0.671277109    | 0.175700922 | 3.82056679  | 0.000133145 | 0.008951307 | Lgals3        | 16854      | 14              |
| ENSMUSG000000025491  | 631.2739523 | 0.854121062    | 0.224268851 | 3.808469427 | 0.00013983  | 0.009294436 | Ifitm1        | 68713      | 7               |
| ENSMUSG000000033585  | 305.3477676 | 0.962534675    | 0.253009146 | 3.804347356 | 0.000142179 | 0.00932083  | Ndn           | 17984      | 7               |
| ENSMUSG000000029201  | 1059.029646 | 0.771055882    | 0.202983816 | 3.798607685 | 0.000145511 | 0.009492085 | Ugdh          | 22235      | 5               |

|                     |             |             |             |             |             |             |               |           |    |
|---------------------|-------------|-------------|-------------|-------------|-------------|-------------|---------------|-----------|----|
| ENSMUSG00000028005  | 186.1039764 | 1.230694363 | 0.324826933 | 3.788769458 | 0.000151395 | 0.009731396 | Gucy1b3       | 54195     | 3  |
| ENSMUSG00000055653  | 5240.324991 | 0.671074446 | 0.177285211 | 3.785281593 | 0.000153535 | 0.009820999 | Gpc3          | 14734     | X  |
| ENSMUSG00000000142  | 609.1554334 | 0.944374794 | 0.251414288 | 3.756249494 | 0.000172479 | 0.010670199 | Axin2         | 12006     | 11 |
| ENSMUSG00000032014  | 74.76513024 | 1.282519972 | 0.343365203 | 3.735148346 | 0.000187605 | 0.011236661 | Oaf           | 102644    | 9  |
| ENSMUSG000000003348 | 716.4835036 | 0.616075637 | 0.16649816  | 3.700194855 | 0.000215434 | 0.012306699 | Mob3a         | 208228    | 10 |
| ENSMUSG00000024538  | 1170.442418 | 0.71215328  | 0.19248821  | 3.699724155 | 0.000215834 | 0.012306699 | Ppic          | 19038     | 18 |
| ENSMUSG00000050105  | 64.76296614 | 1.781500523 | 0.484483418 | 3.677113513 | 0.000235888 | 0.012946424 | Grrp1         | 72690     | 4  |
| ENSMUSG00000047479  | 190.5536996 | 0.78437374  | 0.213368423 | 3.676147238 | 0.000236783 | 0.012946424 | Plk1s1        | 228730    | 2  |
| ENSMUSG00000037347  | 139.9911112 | 1.270076496 | 0.346606631 | 3.66431678  | 0.000248    | 0.013448115 | Chst7         | 60322     | X  |
| ENSMUSG00000024659  | 557.8192861 | 0.863236619 | 0.239754998 | 3.600494779 | 0.000317612 | 0.016158981 | Anxa1         | 16952     | 19 |
| ENSMUSG00000020734  | 43.90858602 | 1.771977086 | 0.493508198 | 3.590572745 | 0.000329952 | 0.016592176 | Grin2c        | 14813     | 11 |
| ENSMUSG00000026347  | 81.91222271 | 1.2919917   | 0.361841759 | 3.570598665 | 0.000356166 | 0.017254422 | Tmem163       | 72160     | 1  |
| ENSMUSG00000025723  | 84.57747378 | 1.292332265 | 0.362378426 | 3.566250558 | 0.000362125 | 0.01732571  | Nmb           | 68039     | 7  |
| ENSMUSG00000000690  | 22.8452417  | 2.976216251 | 0.83650917  | 3.557900329 | 0.000373831 | 0.017592759 | Hoxb6         | 15414     | X  |
| ENSMUSG00000006200  | 128.0443345 | 1.383350252 | 0.388731125 | 3.558630024 | 0.000372794 | 0.017592759 | Rhox6         | 19202     | 11 |
| ENSMUSG00000000753  | 88.00235774 | 1.138397562 | 0.320319141 | 3.553947978 | 0.000379494 | 0.017669951 | Serpinf1      | 20317     | 11 |
| ENSMUSG00000048583  | 20924.62298 | 1.763778333 | 0.49791324  | 3.542340695 | 0.000396593 | 0.018217742 | Igf2          | 16002     | 7  |
| ENSMUSG00000019779  | 158.3636336 | 1.204358543 | 0.341072397 | 3.531093558 | 0.000413845 | 0.018804276 | Frk           | 14302     | 10 |
| ENSMUSG00000029826  | 572.1774945 | 0.752399816 | 0.213025695 | 3.531967421 | 0.00041248  | 0.018804276 | Zc3hav1       | 78781     | 6  |
| ENSMUSG00000027985  | 410.4341479 | 0.986836582 | 0.280186713 | 3.522067742 | 0.000428195 | 0.019325599 | Lef1          | 16842     | 3  |
| ENSMUSG00000030110  | 48.45422129 | 1.655839402 | 0.470415629 | 3.519949808 | 0.000431628 | 0.019374865 | Ret           | 19713     | 6  |
| ENSMUSG00000018819  | 97.32309034 | 1.148317815 | 0.327149214 | 3.51007359  | 0.000447983 | 0.01987565  | Lsp1          | 16985     | 7  |
| ENSMUSG00000027102  | 30.12658109 | 2.033848818 | 0.581120985 | 3.499871574 | 0.000465482 | 0.020445537 | Hoxd8         | 15437     | 2  |
| ENSMUSG00000039081  | 26.98815731 | 2.214662454 | 0.636521309 | 3.47900757  | 0.000503274 | 0.021743103 | Zfp503        | 218820    | 14 |
| ENSMUSG00000052957  | 321.0690726 | 0.867159787 | 0.249229297 | 3.479365378 | 0.000502603 | 0.021743103 | Gas1          | 14451     | 13 |
| ENSMUSG00000026124  | 93.10863363 | 1.807090798 | 0.520759212 | 3.470108176 | 0.000520249 | 0.022361798 | Cfcf1         | 12627     | 7  |
| ENSMUSG00000058019  | 212.4537795 | 0.891800405 | 0.257023273 | 3.469726287 | 0.000520989 | 0.022361798 | 6030429G01Rik | 436022    | 1  |
| ENSMUSG00000044408  | 529.9701348 | 0.629857439 | 0.182336132 | 3.454375347 | 0.000551569 | 0.023146581 | 1110002B05Rik | 104725    | 12 |
| ENSMUSG00000042102  | 43.76501694 | 2.103421971 | 0.610299826 | 3.446538705 | 0.000567817 | 0.023528703 | Dmgdh         | 74129     | 13 |
| ENSMUSG00000027954  | 234.1608836 | 0.783754634 | 0.228435287 | 3.430970079 | 0.000601427 | 0.024535612 | Efnal1        | 13636     | 3  |
| ENSMUSG00000026739  | 249.7036658 | 0.851366901 | 0.248433032 | 3.426947278 | 0.000610408 | 0.02474874  | Bmi1          | 12151     | 2  |
| ENSMUSG00000045333  | 333.6674446 | 0.908403874 | 0.265362393 | 3.423257766 | 0.000618754 | 0.024933694 | Zfp423        | 94187     | 8  |
| ENSMUSG00000028069  | 662.3822588 | 0.651516385 | 0.190449804 | 3.420934915 | 0.000624063 | 0.024994752 | Gpatch4       | 66614     | 3  |
| ENSMUSG00000031661  | 204.2028134 | 1.259915594 | 0.368520495 | 3.418848096 | 0.000628868 | 0.025110899 | Nkd1          | 93960     | 8  |
| ENSMUSG00000072944  | 787.4680846 | 0.635591348 | 0.186127098 | 3.414824355 | 0.000638232 | 0.02540004  | Nup62cl       | 279706    | X  |
| ENSMUSG00000033774  | 23.57056702 | 2.164246882 | 0.635288071 | 3.406717332 | 0.000657492 | 0.025701429 | Npbwr1        | 226304    | 1  |
| ENSMUSG00000029778  | 77.98337059 | 1.323731271 | 0.39044806  | 3.390287736 | 0.000698193 | 0.026822417 | Adeyap1r1     | 11517     | 6  |
| ENSMUSG00000028212  | 279.8024987 | 0.686629797 | 0.203260622 | 3.378075836 | 0.000729949 | 0.02732541  | Ccne2         | 12448     | 4  |
| ENSMUSG00000042258  | 61.77892304 | 2.059807648 | 0.610147096 | 3.375919775 | 0.000735694 | 0.027357856 | Isl1          | 16392     | 13 |
| ENSMUSG00000033763  | 586.2635763 | 0.591255605 | 0.175488134 | 3.369205613 | 0.000753852 | 0.027714515 | Mtss1l        | 244654    | 8  |
| ENSMUSG00000070526  | 50.44535786 | 1.859870292 | 0.552354863 | 3.367165596 | 0.000759451 | 0.027721002 | Peg12         | 27412     | 17 |
| ENSMUSG00000024697  | 27.8346586  | 2.549456864 | 0.758440407 | 3.361446515 | 0.000775354 | 0.028071939 | Gnal14        | 14675     | 9  |
| ENSMUSG00000068048  | 64.82582848 | 1.55728285  | 0.463566232 | 3.359353512 | 0.000781251 | 0.028204216 | Rhox9         | 104384    | X  |
| ENSMUSG00000023942  | 491.9064894 | 0.588092262 | 0.175418653 | 3.35250699  | 0.000800832 | 0.028753585 | Slc29a1       | 63959     | 17 |
| ENSMUSG00000046352  | 48.39730106 | 1.537451    | 0.461628417 | 3.330494706 | 0.000866918 | 0.030061526 | Gjb2          | 14619     | 14 |
| ENSMUSG00000022346  | 626.0440882 | 0.78145252  | 0.234757534 | 3.32876439  | 0.000872322 | 0.030169508 | Myc           | 17869     | 15 |
| ENSMUSG00000040631  | 611.2569082 | 1.563915446 | 0.470624056 | 3.32306737  | 0.000890334 | 0.030551907 | Dok4          | 114255    | 8  |
| ENSMUSG00000029765  | 126.4924966 | 1.448277968 | 0.437119167 | 3.313233729 | 0.000922239 | 0.031401395 | Plxn4         | 243743    | 6  |
| ENSMUSG00000048450  | 523.6718304 | 2.184551489 | 0.659978105 | 3.310036308 | 0.000932839 | 0.031550273 | Msx1          | 17701     | 5  |
| ENSMUSG00000029298  | 92.57453724 | 1.508801165 | 0.457125488 | 3.300627956 | 0.000964857 | 0.032181474 | Gbp9          | 236573    | 5  |
| ENSMUSG00000032897  | 643.2071938 | 0.633624254 | 0.19220442  | 3.296616455 | 0.000978687 | 0.032480155 | Nfyc          | 18046     | 4  |
| ENSMUSG00000092035  | 34105.14985 | 0.937321237 | 0.284822182 | 3.29089972  | 0.000998675 | 0.032900921 | Peg10         | 170676    | 6  |
| ENSMUSG00000032291  | 148.6599521 | 0.974592154 | 0.296826366 | 3.283374608 | 0.001025723 | 0.033372709 | Crabp1        | 12903     | 9  |
| ENSMUSG00000000120  | 46.45589628 | 1.920260031 | 0.586139187 | 3.276116105 | 0.001052543 | 0.033990616 | Ngr1          | 18053     | 11 |
| ENSMUSG00000019789  | 91.61182862 | 1.103174145 | 0.338106508 | 3.262800681 | 0.001103171 | 0.035112274 | Hey2          | 15214     | 10 |
| ENSMUSG00000030170  | 122.0665686 | 1.417265475 | 0.434509978 | 3.261755882 | 0.001107245 | 0.035157014 | Wnt5b         | 22419     | 6  |
| ENSMUSG00000025529  | 132.5336115 | 1.26178139  | 0.388288596 | 3.249596826 | 0.001155687 | 0.036206822 | Zfp711        | 245595    | X  |
| ENSMUSG00000036545  | 75.95336569 | 1.247597701 | 0.384035388 | 3.248652962 | 0.001159528 | 0.036206822 | Adams2        | 216725    | 11 |
| ENSMUSG00000087365  | 159.8753079 | 1.226300099 | 0.377229288 | 3.250808299 | 0.001150774 | 0.036206822 | C430049B03Rik | NA        | X  |
| ENSMUSG00000079481  | 173.5593355 | 1.203221511 | 0.370674722 | 3.246030657 | 0.001170262 | 0.03628364  | Nhsl2         | 100042480 | X  |
| ENSMUSG00000022790  | 116.9654681 | 1.118268383 | 0.346024388 | 3.231761756 | 0.001230296 | 0.037182588 | Igsl1         | 207683    | 16 |
| ENSMUSG00000038244  | 160.2741548 | 0.773104716 | 0.239588898 | 3.226796908 | 0.001251843 | 0.037404836 | Mical2        | 320878    | 7  |
| ENSMUSG00000017493  | 1436.169009 | 1.268390188 | 0.393229761 | 3.225570176 | 0.00125722  | 0.037480519 | Igf1bp4       | 16010     | 11 |
| ENSMUSG00000046743  | 40.60609731 | 2.044361415 | 0.635928622 | 3.214765533 | 0.001305511 | 0.038657797 | Fat4          | 329628    | 3  |
| ENSMUSG00000000567  | 124.0173741 | 1.123578986 | 0.351478328 | 3.196723375 | 0.001389982 | 0.039498407 | Sox9          | 20682     | 11 |
| ENSMUSG00000021506  | 37.8116986  | 1.653876652 | 0.517496003 | 3.195921595 | 0.00139385  | 0.039498407 | Pitx1         | 18740     | 13 |
| ENSMUSG00000038193  | 44.17411324 | 2.125041283 | 0.670823095 | 3.167811751 | 0.001535909 | 0.041951108 | Hand2         | 15111     | 8  |
| ENSMUSG00000001864  | 287.8491282 | 0.665475882 | 0.210655465 | 3.159072472 | 0.001582721 | 0.042832014 | Aif1l         | 108897    | 2  |
| ENSMUSG000000067786 | 135.1318425 | 1.117083388 | 0.353820947 | 3.157199699 | 0.001592922 | 0.042924203 | Nnat          | 18111     | 2  |
| ENSMUSG00000042821  | 371.0679347 | 0.874122045 | 0.277407294 | 3.151042043 | 0.001626891 | 0.043548472 | Snai1         | 20613     | 2  |
| ENSMUSG00000058806  | 27.30566452 | 2.282372194 | 0.724246316 | 3.151375633 | 0.001625034 | 0.043548472 | Coll3a1       | 12817     | 10 |
| ENSMUSG00000031871  | 21.8326788  | 2.116838627 | 0.673511093 | 3.142989996 | 0.001627316 | 0.044338233 | Cdh5          | 12562     | 8  |
| ENSMUSG00000022449  | 32.94683304 | 2.094334543 | 0.667836104 | 3.136000781 | 0.001712687 | 0.044894731 | Adams20       | 223838    | 15 |
| ENSMUSG00000053219  | 68.2590431  | 1.138872646 | 0.363457361 | 3.133442238 | 0.001727689 | 0.045038854 | Raet1e        | 379043    | 7  |
| ENSMUSG00000054716  | 246.7132298 | 0.72212711  | 0.231132016 | 3.124305859 | 0.001782251 | 0.045869275 | Zfp771        | 244216    | 10 |
| ENSMUSG00000029544  | 140.2233861 | 1.385115588 | 0.446273032 | 3.10374029  | 0.00191091  | 0.048053549 | Cabp1         | 29867     | 5  |
| ENSMUSG00000049288  | 100.0647123 | 1.174199241 | 0.378287247 | 3.103988438 | 0.001909308 | 0.048053549 | Lix1l         | 280411    | 3  |
| ENSMUSG00000021614  | 1019.126802 | 1.2602381   | 0.407274167 | 3.094323678 | 0.001972621 | 0.049043836 | Vcan          | 13003     | 13 |
